# Supplementary material for: Wfs1- deficient rats develop primary symptoms of Wolfram syndrome: insulin-dependent diabetes, optic nerve atrophy and medullary degeneration
Source: PubMed Central journal article supplement (PMC5579261; doi:10.1038/s41598-017-09392-x), 2017-08-31
Supplement: 41598_2017_9392_MOESM1_ESM.pdf [file 41598_2017_9392_MOESM1_ESM.pdf]

## Supplementary Material:

**Title:** Wfs1- deficient rats develop primary symptoms of Wolfram syndrome: insulin-dependent diabetes, optic nerve atrophy and medullary degeneration

**Authors:** Mario Plaas, Kadri Seppa, Riin Reimets, Toomas Jagomäe, Maarja Toots, Tuuliki Koppel, Tuuli Vallisoo, Mait Nigul, Indrek Heinla, Riho Meier, Allen Kaasik, Andres Piiirsoo, Miriam A Hickey, Anton Terasmaa, Eero Vasar

|                 |     |            |            |           |       |            |            |
|-----------------|-----|------------|------------|-----------|-------|------------|------------|
| WT              | 201 | LLENVGQVNE | QDGGAQPGPV | PKSLQK    | QRRM  | LERLVSSSEK | NYIALDDFVE |
| Wfs1-ex5-KO232  | 201 | LLENVGQVNE | Q-----     | -----     | ----- | -----AK    | NYIALDDFVE |
| Wfs1-ex5-KO266  | 201 | LLENVGQVNE | Q-----     | -----     | ----- | -----AK    | NYIALDDFVE |
| Wfs1-ex5-INS244 | 201 | LLENVGQVNE | QDGGAQPGPV | PKSYCMNTI | QRRM  | LERLVSSSEK | NYIALDDFVE |

**Figure S1. Predicted WFS1 protein sequence from three different Wfs1 mutant rat lines.** Protein sequence is based on cDNA sequence analysis.

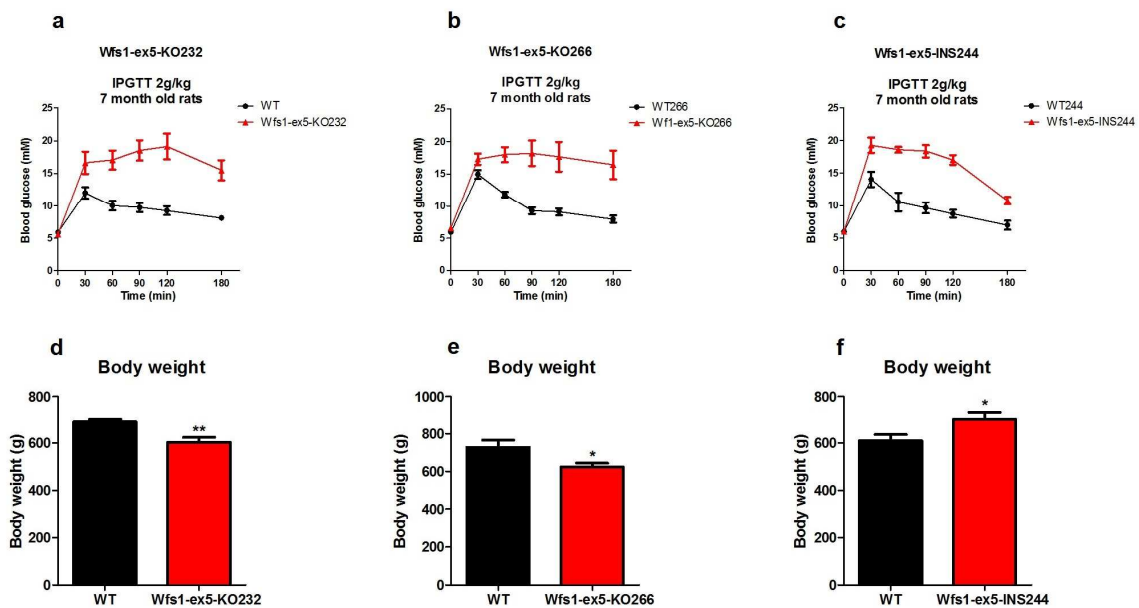

**Figure S2. Glucose tolerance and body weight of three different Wfs1 mutant rat-lines at seven months of age (males).** (a, b, c) All Wfs1 mutant rats display glucose intolerance at this age. (d, e) Wfs1-ex5-KO232 and Wfs1-ex5-KO266 rats are lighter than wild-type littermates. (f) Wfs1-ex5-INS244 rats are heavier than littermates. Student's t-test; \* $p < 0.05$ , \*\*  $< 0.01$  between genotypes. The data are presented as mean  $\pm$  SEM,  $n = 4-7$ .
